# Supplementary material for: Transcriptional Response of Bovine Monocyte-Derived Macrophages after the Infection with Different ArgentineanMycobacterium bovisIsolates
Source: Hindawi journal article supplement (doi:10.1155/2013/458278), 2013-01-01
Supplement: f1 [file 458278.f1.pdf]

**Probesets differentially expressed in 303 infected vs. control (cut-off: p.adj <= 0.05)**

| probeset ID      | Gene symbol | Gene Entrez ID | Gene name                                         | logFC  | FC     | P.Value   | adj.P.Val |
|------------------|-------------|----------------|---------------------------------------------------|--------|--------|-----------|-----------|
| Bt.28345.1.S1_at | ANKRD17     | 508405         | ankyrin repeat domain 17                          | 1,456  | 2,743  | 6,628E-03 | 0,032783  |
| Bt.234.1.S1_at   | IL18        | 281249         | interleukin 18 (interferon-gamma-inducing factor) | 1,440  | 2,714  | 7,235E-03 | 0,033570  |
| Bt.23611.3.S1_at | TIPARP      | 540975         | TCDD-inducible poly(ADP-ribose) polymerase        | 1,340  | 2,531  | 1,245E-02 | 0,042252  |
| Bt.24217.1.S1_at | NFE2        | 514006         | nuclear factor (erythroid-derived 2), 45kDa       | -1,364 | -2,575 | 1,095E-02 | 0,039242  |
| Bt.12504.1.S1_at | CLU         | 280750         | clusterin                                         | -1,670 | -3,182 | 1,852E-03 | 0,016635  |

**Probesets differentially expressed in 303-infected vs. control and 534-infected vs. control (cut-off: p.adj <= 0.05)**

| probeset ID        | Gene symbol  | Gene Entrez ID | Gene name                                                                                                                                                                                                                                                       | logFC | FC    | P.Value   | adj.P.Val |
|--------------------|--------------|----------------|-----------------------------------------------------------------------------------------------------------------------------------------------------------------------------------------------------------------------------------------------------------------|-------|-------|-----------|-----------|
| Bt.19496.1.A1_at   |              |                |                                                                                                                                                                                                                                                                 | 2,753 | 6,743 | 3,035E-07 | 0,000141  |
| Bt.23911.1.A1_at   | XIST         | 338325         | X (inactive)-specific transcript                                                                                                                                                                                                                                | 2,603 | 6,078 | 1,270E-06 | 0,000295  |
| Bt.28320.1.A1_at   |              |                |                                                                                                                                                                                                                                                                 | 2,528 | 5,769 | 2,532E-06 | 0,000392  |
| Bt.6566.2.S1_a_at  |              |                |                                                                                                                                                                                                                                                                 | 2,279 | 4,854 | 2,194E-05 | 0,002512  |
| Bt.647.1.S1_at     | MTPN         | 541099         | myotrophin                                                                                                                                                                                                                                                      | 2,194 | 4,575 | 4,399E-05 | 0,002707  |
| Bt.11778.1.A1_at   |              |                |                                                                                                                                                                                                                                                                 | 2,178 | 4,526 | 4,974E-05 | 0,002707  |
| Bt.18321.1.A1_at   | GNB4         | 525962         | guanine nucleotide binding protein (G protein), beta polypeptide 4                                                                                                                                                                                              | 2,158 | 4,464 | 5,823E-05 | 0,002707  |
| Bt.23678.1.A1_at   | RQCD1        | 536537         | RCD1 required for cell differentiation1 homolog (S. pombe)                                                                                                                                                                                                      | 2,158 | 4,463 | 5,834E-05 | 0,002707  |
| Bt.12745.3.S1_at   | ANTXR2       | 510080         | anthrax toxin receptor 2                                                                                                                                                                                                                                        | 2,093 | 4,266 | 9,681E-05 | 0,004084  |
| Bt.2096.2.S1_at    | EHD4         | 505206         | EH-domain containing 4                                                                                                                                                                                                                                          | 2,070 | 4,200 | 1,150E-04 | 0,004446  |
| Bt.17932.2.S1_a_at | CCNL1        | 514613         | cyclin L1                                                                                                                                                                                                                                                       | 2,017 | 4,048 | 1,712E-04 | 0,005775  |
| Bt.20947.2.S1_at   | LOC100140708 | 100140708      | similar to IQ motif containing GTPase activating protein 2                                                                                                                                                                                                      | 2,015 | 4,041 | 1,742E-04 | 0,005775  |
| Bt.22594.1.S1_at   | LOC789894    | 789894         | similar to PAP-associated domain-containing protein 5 (Topoisomerase-related function protein 4-2) (TRF4-2)                                                                                                                                                     | 1,959 | 3,887 | 2,630E-04 | 0,007072  |
| Bt.27386.1.A1_at   | ANKRD50      | 527956         | ankyrin repeat domain 50                                                                                                                                                                                                                                        | 1,941 | 3,840 | 2,983E-04 | 0,007284  |
| Bt.18060.1.A1_at   |              |                |                                                                                                                                                                                                                                                                 | 1,922 | 3,789 | 3,424E-04 | 0,007943  |
| Bt.1699.2.S1_a_at  | RBPJ         | 767928         | similar to Recombining binding protein suppressor of hairless (J kappa-recombination signal-binding protein) (RBP-J kappa) (RBP-J) (RBP-JK) (CBF-1) (Renal carcinoma antigen NY-REN-30); recombination signal binding protein for immunoglobulin kappa J region | 1,884 | 3,691 | 4,465E-04 | 0,008711  |
| Bt.11954.1.S1_at   | SLTM         | 515193         | similar to SAFB-like transcription modulator (Modulator of estrogen-induced transcription)                                                                                                                                                                      | 1,883 | 3,688 | 4,505E-04 | 0,008711  |
| Bt.13284.1.A1_at   |              |                |                                                                                                                                                                                                                                                                 | 1,882 | 3,687 | 4,516E-04 | 0,008711  |
| Bt.2663.2.S1_at    | KRAS         | 541140         | v-Ki-ras2 Kirsten rat sarcoma viral oncogene homolog                                                                                                                                                                                                            | 1,880 | 3,681 | 4,594E-04 | 0,008711  |
| Bt.7131.2.S1_at    | PLDN         | 614408         | pallidin homolog (mouse)                                                                                                                                                                                                                                        | 1,874 | 3,666 | 4,785E-04 | 0,008711  |
| Bt.15806.1.A1_at   | IREB2        | 539404         | similar to iron-responsive element binding protein 2                                                                                                                                                                                                            | 1,868 | 3,649 | 5,010E-04 | 0,008711  |

probesets

|                  |              |           |                                                                              |       |       |           |          |
|------------------|--------------|-----------|------------------------------------------------------------------------------|-------|-------|-----------|----------|
| Bt.24258.2.S1_at | MAN1A1       | 530027    | mannosidase, alpha, class 1A, member 1                                       | 1,866 | 3,645 | 5,069E-04 | 0,008711 |
| Bt.9710.1.S1_at  | PRPF4B       | 512236    | PRP4 pre-mRNA processing factor 4 homolog B (yeast)                          | 1,840 | 3,580 | 6,057E-04 | 0,009319 |
| Bt.20931.1.S1_at | PPP1CB       | 538829    | protein phosphatase 1, catalytic subunit, beta isoform                       | 1,836 | 3,570 | 6,226E-04 | 0,009319 |
| Bt.22109.1.S1_at | GOPC         | 541186    | golgi-associated PDZ and coiled-coil motif containing                        | 1,824 | 3,541 | 6,747E-04 | 0,009693 |
| Bt.9438.1.S1_at  | SYNCRIP      | 511763    | synaptotagmin binding, cytoplasmic RNA interacting protein                   | 1,813 | 3,513 | 7,291E-04 | 0,009693 |
| Bt.3311.3.S1_at  |              |           |                                                                              | 1,812 | 3,512 | 7,312E-04 | 0,009693 |
| Bt.24221.2.S1_at |              |           |                                                                              | 1,780 | 3,434 | 9,091E-04 | 0,011558 |
| Bt.25292.1.A1_at |              |           |                                                                              | 1,776 | 3,426 | 9,295E-04 | 0,011558 |
| Bt.7672.1.A1_at  |              |           |                                                                              | 1,774 | 3,419 | 9,466E-04 | 0,011558 |
| Bt.15677.1.A1_at | LOC100299693 | 100299693 | PRP38 pre-mRNA processing factor 38 (yeast) domain containing B              | 1,763 | 3,393 | 1,018E-03 | 0,011968 |
| Bt.17514.1.S1_at |              |           |                                                                              | 1,761 | 3,389 | 1,032E-03 | 0,011968 |
| Bt.25051.1.A1_at | TTC14        | 512635    | tetratricopeptide repeat domain 14                                           | 1,738 | 3,336 | 1,196E-03 | 0,013538 |
| Bt.16124.2.S1_at |              |           |                                                                              | 1,733 | 3,325 | 1,234E-03 | 0,013630 |
| Bt.6276.2.S1_at  | RAB6A        | 616537    | RAB6A, member RAS oncogene family; RAB6B, member RAS oncogene family         | 1,724 | 3,304 | 1,308E-03 | 0,014119 |
| Bt.6180.2.S1_at  | FRG1         | 512533    | FSHD region gene 1; hypothetical LOC780996                                   | 1,717 | 3,287 | 1,372E-03 | 0,014425 |
| Bt.21071.1.S1_at |              |           |                                                                              | 1,714 | 3,281 | 1,399E-03 | 0,014425 |
| Bt.9847.1.S1_at  | C22H3orf63   | 510095    | chromosome 3 open reading frame 63 ortholog                                  | 1,708 | 3,266 | 1,458E-03 | 0,014551 |
| Bt.26872.1.S1_at | NIPSNAP3A    | 534363    | nipsnap homolog 3A (C. elegans)                                              | 1,705 | 3,260 | 1,481E-03 | 0,014551 |
| Bt.24590.2.S1_at | LSM14A       | 538838    | LSM14A, SCD6 homolog A (S. cerevisiae)                                       | 1,703 | 3,255 | 1,505E-03 | 0,014551 |
| Bt.24537.1.A1_at | ZRANB2       | 508905    | zinc finger, RAN-binding domain containing 2                                 | 1,690 | 3,226 | 1,635E-03 | 0,015483 |
| Bt.24691.1.A1_at | MLL5         | 539121    | myeloid/lymphoid or mixed-lineage leukemia 5 (trithorax homolog, Drosophila) | 1,675 | 3,193 | 1,793E-03 | 0,016635 |
| Bt.9845.1.S1_at  | TAPT1        | 615598    | transmembrane anterior posterior transformation 1                            | 1,669 | 3,180 | 1,864E-03 | 0,016635 |
| Bt.22626.2.S1_at | ANKRD12      | 534739    | ankyrin repeat domain 12                                                     | 1,657 | 3,154 | 2,005E-03 | 0,017432 |
| Bt.2478.2.S1_at  | VPS26A       | 510574    | vacuolar protein sorting 26 homolog A (S. pombe)                             | 1,655 | 3,150 | 2,029E-03 | 0,017432 |
| Bt.13706.2.S1_at | COMMD10      | 538706    | COMM domain containing 10                                                    | 1,651 | 3,140 | 2,087E-03 | 0,017610 |
| Bt.29874.1.S1_at | EIF2C3       | 406231    | eukaryotic translation initiation factor 2C, 3                               | 1,637 | 3,110 | 2,275E-03 | 0,018852 |
| Bt.25965.1.A1_at | NCOR1        | 507663    | nuclear receptor co-repressor 1                                              | 1,632 | 3,100 | 2,340E-03 | 0,018864 |
| Bt.1615.1.A1_at  | DENND4A      | 514906    | DENN/MADD domain containing 4A                                               | 1,631 | 3,098 | 2,358E-03 | 0,018864 |
| Bt.28621.1.S1_at |              |           |                                                                              | 1,620 | 3,075 | 2,519E-03 | 0,019808 |
| Bt.23342.1.S1_at |              |           |                                                                              | 1,612 | 3,056 | 2,658E-03 | 0,020221 |
| Bt.19645.1.A1_at | CHD1         | 505123    | chromodomain helicase DNA binding protein 1                                  | 1,603 | 3,037 | 2,810E-03 | 0,021029 |
| Bt.17148.2.S1_at | FEM1C        | 541180    | fem-1 homolog c (C. elegans)                                                 | 1,596 | 3,022 | 2,930E-03 | 0,021320 |
| Bt.20770.1.A1_at |              |           |                                                                              | 1,591 | 3,012 | 3,020E-03 | 0,021560 |
| Bt.16661.1.A1_at | BAZ1A        | 540621    | bromodomain adjacent to zinc finger domain, 1A                               | 1,582 | 2,993 | 3,191E-03 | 0,022431 |
| Bt.9176.2.S1_at  | CUL4B        | 539668    | cullin 4B                                                                    | 1,574 | 2,976 | 3,349E-03 | 0,023195 |
| Bt.6943.1.S1_at  |              |           |                                                                              | 1,564 | 2,957 | 3,542E-03 | 0,024167 |

probesets

|                    |           |           |                                                                                                                                     |       |       |           |          |
|--------------------|-----------|-----------|-------------------------------------------------------------------------------------------------------------------------------------|-------|-------|-----------|----------|
| Bt.9603.2.S1_at    | INTS8     | 100124522 | integrator complex subunit 8                                                                                                        | 1,561 | 2,951 | 3,605E-03 | 0,024243 |
| Bt.20080.1.S1_at   | WSB1      | 614851    | WD repeat and SOCS box-containing 1                                                                                                 | 1,540 | 2,908 | 4,085E-03 | 0,026693 |
| Bt.7150.2.S1_at    | BIRC6     | 534211    | baculoviral IAP repeat-containing 6                                                                                                 | 1,536 | 2,900 | 4,186E-03 | 0,026933 |
| Bt.18474.2.A1_at   | SHOC2     | 511417    | soc-2 suppressor of clear homolog (C. elegans)                                                                                      | 1,532 | 2,892 | 4,278E-03 | 0,026933 |
| Bt.2177.2.S1_at    | FAM114A1  | 511583    | similar to Family with sequence similarity 114, member A1                                                                           | 1,530 | 2,887 | 4,344E-03 | 0,026933 |
| Bt.6824.1.A1_at    | TET2      | 538481    | similar to CXXC finger 6                                                                                                            | 1,529 | 2,886 | 4,353E-03 | 0,026933 |
| Bt.13614.1.A1_at   | ARMC1     | 514000    | armadillo repeat containing 1                                                                                                       | 1,523 | 2,874 | 4,510E-03 | 0,027186 |
| Bt.22620.1.S1_at   | ZBTB1     | 526903    | zinc finger and BTB domain containing 1                                                                                             | 1,523 | 2,874 | 4,511E-03 | 0,027186 |
| Bt.24678.1.A1_at   | TBC1D9    | 537817    | TBC1 domain family, member 9 (with GRAM domain)                                                                                     | 1,520 | 2,869 | 4,581E-03 | 0,027252 |
| Bt.120.1.S1_at     | ROCK2     | 282041    | E2F transcription factor 6; Rho-associated, coiled-coil containing protein kinase 2                                                 | 1,516 | 2,861 | 4,694E-03 | 0,027298 |
| Bt.29953.2.S1_at   | CCNYL1    | 538167    | cyclin Y-like 1                                                                                                                     | 1,511 | 2,851 | 4,835E-03 | 0,027694 |
| Bt.22564.2.S1_at   | GGTA1     | 281780    | alpha-galactosyltransferase 1 (glycoprotein)                                                                                        | 1,496 | 2,820 | 5,283E-03 | 0,029893 |
| Bt.23265.1.S1_at   | SPRED1    | 519882    | sprouty-related, EVH1 domain containing 1                                                                                           | 1,489 | 2,807 | 5,494E-03 | 0,030409 |
| Bt.9631.1.S1_at    | MFN1      | 515180    | similar to mitofusin 1                                                                                                              | 1,487 | 2,803 | 5,560E-03 | 0,030409 |
| Bt.21982.1.S1_a_at | IQGAP1    | 532715    | IQ motif containing GTPase activating protein 1                                                                                     | 1,483 | 2,796 | 5,680E-03 | 0,030409 |
| Bt.17311.2.S1_at   | RP2       | 534054    | retinitis pigmentosa 2 (X-linked recessive)                                                                                         | 1,481 | 2,791 | 5,767E-03 | 0,030409 |
| Bt.4095.2.S1_at    | TOR1B     | 533928    | torsin family 1, member B (torsin B)                                                                                                | 1,481 | 2,791 | 5,767E-03 | 0,030409 |
| Bt.17129.2.A1_at   |           |           |                                                                                                                                     | 1,472 | 2,774 | 6,051E-03 | 0,031547 |
| Bt.2105.2.A1_at    | LATS1     | 535935    | LATS, large tumor suppressor, homolog 1 (Drosophila)                                                                                | 1,460 | 2,751 | 6,489E-03 | 0,032760 |
| Bt.11073.1.S1_at   | C8H9orf21 | 616897    | chromosome 9 open reading frame 21 ortholog                                                                                         | 1,460 | 2,750 | 6,496E-03 | 0,032760 |
| Bt.16920.1.A1_s_at |           |           |                                                                                                                                     | 1,451 | 2,733 | 6,827E-03 | 0,033345 |
| Bt.13818.1.S1_at   | SIRT1     | 613629    | sirtuin (silent mating type information regulation 2 homolog) 1 (S. cerevisiae)                                                     | 1,442 | 2,718 | 7,153E-03 | 0,033570 |
| Bt.5542.2.S1_at    | LOC540136 | 540136    | similar to Nucleosome assembly protein 1-like 1 (NAP-1-related protein) (hNRP); similar to rCG48740; hypothetical protein LOC790872 | 1,442 | 2,717 | 7,173E-03 | 0,033570 |
| Bt.28750.1.S1_at   | IL13RA1   | 407110    | interleukin 13 receptor, alpha 1                                                                                                    | 1,442 | 2,716 | 7,181E-03 | 0,033570 |
| Bt.28702.1.S1_at   |           |           |                                                                                                                                     | 1,440 | 2,714 | 7,235E-03 | 0,033570 |
| Bt.8264.1.A1_at    |           |           |                                                                                                                                     | 1,436 | 2,705 | 7,423E-03 | 0,034101 |
| Bt.864.2.S1_at     | SRSF1     | 615796    | splicing factor, arginine/serine-rich 1                                                                                             | 1,431 | 2,697 | 7,601E-03 | 0,034232 |
| Bt.28189.2.S1_at   |           |           |                                                                                                                                     | 1,431 | 2,696 | 7,627E-03 | 0,034232 |
| Bt.24692.1.S1_at   | ADRBK2    | 282136    | adrenergic, beta, receptor kinase 2                                                                                                 | 1,430 | 2,694 | 7,673E-03 | 0,034232 |
| Bt.633.3.S1_at     | SFXN1     | 511375    | sideroflexin 1                                                                                                                      | 1,426 | 2,687 | 7,841E-03 | 0,034254 |
| Bt.8353.3.S1_at    | HEATR1    | 506978    | HEAT repeat containing 1                                                                                                            | 1,424 | 2,683 | 7,920E-03 | 0,034254 |
| Bt.26700.1.S1_at   | HNMT      | 613413    | histamine N-methyltransferase                                                                                                       | 1,423 | 2,681 | 7,962E-03 | 0,034254 |
| Bt.9162.1.A1_at    | CHORDC1   | 505144    | cysteine and histidine-rich domain (CHORD)-containing 1                                                                             | 1,420 | 2,676 | 8,094E-03 | 0,034254 |
| Bt.18167.1.A1_at   |           |           |                                                                                                                                     | 1,420 | 2,675 | 8,111E-03 | 0,034254 |
| Bt.17444.1.S1_at   |           |           |                                                                                                                                     | 1,419 | 2,675 | 8,120E-03 | 0,034254 |

probesets

|                    |           |        |                                                                                                                                                                                                     |       |       |           |          |
|--------------------|-----------|--------|-----------------------------------------------------------------------------------------------------------------------------------------------------------------------------------------------------|-------|-------|-----------|----------|
| Bt.3964.1.S1_at    | SLC2A3    | 282358 | solute carrier family 2 (facilitated glucose transporter), member 3                                                                                                                                 | 1,412 | 2,660 | 8,481E-03 | 0,035306 |
| Bt.24447.2.S1_at   | F2RL2     | 512581 | coagulation factor II (thrombin) receptor-like 2                                                                                                                                                    | 1,411 | 2,659 | 8,522E-03 | 0,035306 |
| Bt.11034.1.S1_at   | MID1IP1   | 615572 | MID1 interacting protein 1 (gastrulation specific G12 homolog (zebrafish))                                                                                                                          | 1,406 | 2,651 | 8,725E-03 | 0,035603 |
| Bt.2098.2.S1_at    | ARHGEF12  | 503575 | Rho guanine nucleotide exchange factor (GEF) 12                                                                                                                                                     | 1,406 | 2,650 | 8,747E-03 | 0,035603 |
| Bt.1455.1.S1_at    |           |        |                                                                                                                                                                                                     | 1,400 | 2,639 | 9,029E-03 | 0,036098 |
| Bt.4787.1.S1_at    | EEF2K     | 521730 | eukaryotic elongation factor-2 kinase                                                                                                                                                               | 1,398 | 2,635 | 9,152E-03 | 0,036098 |
| Bt.28133.1.S1_at   | MLL3      | 789336 | similar to Myeloid/lymphoid or mixed-lineage leukemia protein 3 homolog (Histone-lysine N-methyltransferase, H3 lysine-4 specific MLL3) (Homologous to ALR protein) (Lysine N-methyltransferase 2C) | 1,396 | 2,631 | 9,239E-03 | 0,036098 |
| Bt.25055.1.A1_at   | IPMK      | 615135 | inositol polyphosphate multikinase                                                                                                                                                                  | 1,395 | 2,631 | 9,262E-03 | 0,036098 |
| Bt.10153.1.S1_at   | EIF2C4    | 528046 | eukaryotic translation initiation factor 2C, 4                                                                                                                                                      | 1,395 | 2,629 | 9,305E-03 | 0,036098 |
| Bt.21987.2.S1_a_at | PPIG      | 783720 | peptidylprolyl isomerase G (cyclophilin G)                                                                                                                                                          | 1,394 | 2,627 | 9,349E-03 | 0,036098 |
| Bt.23618.1.A1_at   |           |        |                                                                                                                                                                                                     | 1,392 | 2,625 | 9,413E-03 | 0,036098 |
| Bt.8169.1.S1_at    | SLC39A6   | 524456 | solute carrier family 39 (zinc transporter), member 6                                                                                                                                               | 1,380 | 2,603 | 1,006E-02 | 0,037836 |
| Bt.24376.1.S1_at   | MTSS1     | 523498 | metastasis suppressor 1                                                                                                                                                                             | 1,379 | 2,601 | 1,011E-02 | 0,037836 |
| Bt.24546.1.S1_at   | SMEK1     | 407220 | SMEK homolog 1, suppressor of mek1                                                                                                                                                                  | 1,375 | 2,595 | 1,031E-02 | 0,038279 |
| Bt.19243.2.S1_at   | SNX6      | 532685 | similar to sorting nexin 6; sorting nexin 6                                                                                                                                                         | 1,368 | 2,581 | 1,074E-02 | 0,039242 |
| Bt.27529.1.S1_at   | NUP155    | 506738 | nucleoporin 155kDa                                                                                                                                                                                  | 1,364 | 2,574 | 1,095E-02 | 0,039242 |
| Bt.27177.1.A1_at   | MAP7D3    | 506950 | MAP7 domain containing 3                                                                                                                                                                            | 1,361 | 2,569 | 1,112E-02 | 0,039382 |
| Bt.648.2.S1_at     | LRRFIP1   | 616994 | leucine rich repeat (in FLII) interacting protein 1                                                                                                                                                 | 1,350 | 2,549 | 1,182E-02 | 0,041433 |
| Bt.1711.1.A1_at    | LOC615263 | 615263 | hypothetical protein LOC615263                                                                                                                                                                      | 1,349 | 2,547 | 1,188E-02 | 0,041433 |
| Bt.13990.2.S1_at   | ZCCHC8    | 539598 | zinc finger, CCHC domain containing 8                                                                                                                                                               | 1,341 | 2,533 | 1,238E-02 | 0,042252 |
| Bt.3197.1.A1_at    | CCAR1     | 767587 | cell division cycle and apoptosis regulator 1                                                                                                                                                       | 1,341 | 2,533 | 1,241E-02 | 0,042252 |
| Bt.6800.1.A1_at    |           |        |                                                                                                                                                                                                     | 1,339 | 2,530 | 1,249E-02 | 0,042252 |
| Bt.12606.1.S1_a_at |           |        |                                                                                                                                                                                                     | 1,337 | 2,526 | 1,265E-02 | 0,042252 |
| Bt.21348.1.A1_a_at | SNRNP48   | 513601 | small nuclear ribonucleoprotein 48kDa (U11/U12)                                                                                                                                                     | 1,337 | 2,526 | 1,266E-02 | 0,042252 |
| Bt.13324.1.S1_a_at | IDH1      | 281235 | isocitrate dehydrogenase 1 (NADP+), soluble; similar to Isocitrate dehydrogenase 1 (NADP+), soluble                                                                                                 | 1,334 | 2,522 | 1,282E-02 | 0,042485 |
| Bt.29945.1.S1_at   | PCMTD1    | 521261 | protein-L-isoaspartate (D-aspartate) O-methyltransferase domain containing 1                                                                                                                        | 1,333 | 2,519 | 1,293E-02 | 0,042548 |
| Bt.22090.2.S1_at   |           |        |                                                                                                                                                                                                     | 1,330 | 2,514 | 1,311E-02 | 0,042849 |
| Bt.22822.2.S1_at   |           |        |                                                                                                                                                                                                     | 1,327 | 2,509 | 1,332E-02 | 0,043230 |
| Bt.24697.1.A1_at   | KIF3A     | 541246 | kinesin family member 3A                                                                                                                                                                            | 1,312 | 2,482 | 1,443E-02 | 0,045863 |
| Bt.19799.1.S1_at   | SPAG9     | 540689 | sperm associated antigen 9                                                                                                                                                                          | 1,301 | 2,464 | 1,522E-02 | 0,047738 |
| Bt.6017.2.S1_at    |           |        |                                                                                                                                                                                                     | 1,301 | 2,463 | 1,527E-02 | 0,047738 |
| Bt.12220.1.S1_a_at |           |        |                                                                                                                                                                                                     | 1,300 | 2,462 | 1,533E-02 | 0,047738 |
| Bt.2318.2.S1_at    |           |        |                                                                                                                                                                                                     | 1,294 | 2,452 | 1,580E-02 | 0,048890 |

probesets

|                   |          |        |                                                          |        |        |           |          |
|-------------------|----------|--------|----------------------------------------------------------|--------|--------|-----------|----------|
| Bt.22126.1.S1_at  | TSPAN5   | 538668 | tetraspanin 5                                            | -1,380 | -2,603 | 1,005E-02 | 0,037836 |
| Bt.18202.1.A1_at  |          |        |                                                          | -1,456 | -2,743 | 6,641E-03 | 0,032783 |
| Bt.8319.1.S1_at   | MTUS1    | 515016 | mitochondrial tumor suppressor 1                         | -1,482 | -2,794 | 5,714E-03 | 0,030409 |
| Bt.1927.1.S1_at   | CRISPLD2 | 505329 | cysteine-rich secretory protein LCCL domain containing 2 | -1,550 | -2,928 | 3,855E-03 | 0,025555 |
| Bt.2047.1.S1_at   | ADM      | 280713 | adrenomedullin                                           | -1,816 | -3,522 | 7,108E-04 | 0,009693 |
| Bt.24314.1.A1_at  |          |        |                                                          | -1,953 | -3,871 | 2,744E-04 | 0,007072 |
| Bt.4209.2.S1_a_at | C3       | 280677 | complement component 3                                   | -1,983 | -3,954 | 2,198E-04 | 0,006374 |
| Bt.15290.1.A1_at  |          |        |                                                          | -2,209 | -4,625 | 3,879E-05 | 0,002707 |

**Probesets differentially expressed in 534 infected vs. control (cut-off: p.adj <= 0.05)**

| probeset ID        | Gene symbol | Gene Entrez ID | Gene name                                                                            | logFC | FC    | P.Value   | adj.P.Val |
|--------------------|-------------|----------------|--------------------------------------------------------------------------------------|-------|-------|-----------|-----------|
| Bt.24940.1.A1_at   |             |                |                                                                                      | 2,762 | 6,784 | 2,698E-06 | 1,043E-04 |
| Bt.5395.1.S1_a_at  | VCAN        | 282662         | versican                                                                             | 2,116 | 4,336 | 3,182E-04 | 2,636E-03 |
| Bt.24975.1.S1_at   | YTHDC2      | 541024         | YTH domain containing 2                                                              | 2,037 | 4,104 | 5,290E-04 | 3,880E-03 |
| Bt.20867.1.A1_at   | RPUSD3      | 534606         | RNA pseudouridylate synthase domain containing 3                                     | 1,988 | 3,966 | 7,210E-04 | 4,646E-03 |
| Bt.7839.1.A1_at    | SON         | 516462         | SON DNA binding protein                                                              | 1,978 | 3,939 | 7,658E-04 | 4,716E-03 |
| Bt.6973.2.A1_at    |             |                |                                                                                      | 1,976 | 3,935 | 7,725E-04 | 4,716E-03 |
| Bt.21695.1.S1_at   |             |                |                                                                                      | 1,962 | 3,897 | 8,410E-04 | 4,902E-03 |
| Bt.25081.1.S1_at   |             |                |                                                                                      | 1,957 | 3,881 | 8,718E-04 | 4,994E-03 |
| Bt.20407.2.A1_at   | CPEB4       | 538794         | cytoplasmic polyadenylation element binding protein 4                                | 1,933 | 3,818 | 1,007E-03 | 5,498E-03 |
| Bt.12164.1.S1_at   |             |                |                                                                                      | 1,909 | 3,754 | 1,164E-03 | 6,210E-03 |
| Bt.8521.1.A1_at    |             |                |                                                                                      | 1,890 | 3,707 | 1,298E-03 | 6,766E-03 |
| Bt.27023.1.S1_at   |             |                |                                                                                      | 1,868 | 3,649 | 1,483E-03 | 7,237E-03 |
| Bt.2451.2.A1_at    | CREBZF      | 538594         | CREB/ATF bZIP transcription factor                                                   | 1,861 | 3,632 | 1,543E-03 | 7,237E-03 |
| Bt.8872.1.S1_at    | ATP2B1      | 282641         | ATPase, Ca <sup>++</sup> transporting, plasma membrane 1                             | 1,850 | 3,606 | 1,639E-03 | 7,237E-03 |
| Bt.19425.1.S1_at   | LARP4       | 539286         | La ribonucleoprotein domain family, member 4                                         | 1,849 | 3,601 | 1,657E-03 | 7,237E-03 |
| Bt.22714.1.A1_at   | TMOD3       | 533257         | tropomodulin 3 (ubiquitous)                                                          | 1,848 | 3,601 | 1,658E-03 | 7,237E-03 |
| Bt.3105.1.S1_at    | CLINT1      | 538540         | clathrin interactor 1                                                                | 1,848 | 3,599 | 1,664E-03 | 7,237E-03 |
| Bt.10920.1.S1_at   | TTC3        | 506569         | tetratricopeptide repeat domain 3                                                    | 1,847 | 3,598 | 1,669E-03 | 7,237E-03 |
| Bt.28265.2.S1_at   |             |                |                                                                                      | 1,833 | 3,564 | 1,809E-03 | 7,609E-03 |
| Bt.27865.2.S1_at   | VPRBP       |                | Vpr (HIV-1) binding protein                                                          | 1,832 | 3,561 | 1,820E-03 | 7,609E-03 |
| Bt.3741.1.S1_at    | TSC1        | 533440         | tuberous sclerosis 1                                                                 | 1,828 | 3,551 | 1,863E-03 | 7,718E-03 |
| Bt.27429.2.A1_at   | SF3B1       | 510177         | splicing factor 3b, subunit 1, 155kDa                                                | 1,824 | 3,541 | 1,905E-03 | 7,823E-03 |
| Bt.20759.1.A1_at   |             |                |                                                                                      | 1,811 | 3,510 | 2,051E-03 | 8,130E-03 |
| Bt.11220.2.S1_a_at | RALB        | 505238         | v-ral simian leukemia viral oncogene homolog B (ras related; GTP binding protein)    | 1,810 | 3,507 | 2,068E-03 | 8,130E-03 |
| Bt.4773.3.S1_a_at  | ATP6V1A     | 282147         | ATPase, H <sup>+</sup> transporting, lysosomal 70kDa, V1 subunit A                   | 1,797 | 3,476 | 2,223E-03 | 8,667E-03 |
| Bt.12001.3.A1_at   | ARFGEF2     | 539295         | ADP-ribosylation factor guanine nucleotide-exchange factor 2 (brefeldin A-inhibited) | 1,760 | 3,386 | 2,745E-03 | 1,043E-02 |

probesets

|                  |              |           |                                                                                                                                                     |       |       |           |           |
|------------------|--------------|-----------|-----------------------------------------------------------------------------------------------------------------------------------------------------|-------|-------|-----------|-----------|
| Bt.18234.1.S1_at | IGSF6        | 100140740 | similar to DORA protein                                                                                                                             | 1,758 | 3,383 | 2,766E-03 | 1,043E-02 |
| Bt.10884.2.S1_at |              |           |                                                                                                                                                     | 1,753 | 3,370 | 2,853E-03 | 1,063E-02 |
| Bt.22543.1.S1_at |              |           |                                                                                                                                                     | 1,750 | 3,364 | 2,893E-03 | 1,063E-02 |
| Bt.16683.1.S1_at | C1D          | 506667    | C1D nuclear receptor co-repressor                                                                                                                   | 1,750 | 3,364 | 2,897E-03 | 1,063E-02 |
| Bt.864.2.S1_a_at | SRSF1        | 615796    | splicing factor, arginine/serine-rich 1                                                                                                             | 1,746 | 3,355 | 2,958E-03 | 1,072E-02 |
| Bt.27936.1.S1_at |              |           |                                                                                                                                                     | 1,728 | 3,313 | 3,268E-03 | 1,149E-02 |
| Bt.6497.1.S1_at  | SMEK2        | 516489    | SMEK homolog 2, suppressor of mek1 (Dictyostelium)                                                                                                  | 1,723 | 3,302 | 3,355E-03 | 1,170E-02 |
| Bt.25965.2.S1_at | NCOR1        | 507663    | nuclear receptor co-repressor 1                                                                                                                     | 1,711 | 3,273 | 3,596E-03 | 1,218E-02 |
| Bt.27024.1.A1_at | CCAR1        | 767587    | cell division cycle and apoptosis regulator 1                                                                                                       | 1,708 | 3,267 | 3,652E-03 | 1,221E-02 |
| Bt.24391.1.A1_at |              |           |                                                                                                                                                     | 1,698 | 3,245 | 3,850E-03 | 1,249E-02 |
| Bt.27436.1.A1_at | INO80        | 505992    | INO80 homolog (S. cerevisiae)                                                                                                                       | 1,693 | 3,234 | 3,946E-03 | 1,272E-02 |
| Bt.7236.1.S1_at  | PIK3R1       | 282307    | phosphoinositide-3-kinase, regulatory subunit 1 (alpha)                                                                                             | 1,682 | 3,209 | 4,190E-03 | 1,341E-02 |
| Bt.2415.2.S1_at  | ID2          | 505025    | inhibitor of DNA binding 2, dominant negative helix-loop-helix protein                                                                              | 1,679 | 3,201 | 4,275E-03 | 1,349E-02 |
| Bt.8824.1.S1_at  |              |           |                                                                                                                                                     | 1,674 | 3,192 | 4,371E-03 | 1,364E-02 |
| Bt.28626.1.S1_at | LOC521363    | 521363    | similar to GC-rich sequence DNA-binding factor (GCF) (Transcription factor 9) (TCF-9)                                                               | 1,672 | 3,186 | 4,438E-03 | 1,364E-02 |
| Bt.26597.1.S1_at |              |           |                                                                                                                                                     | 1,665 | 3,170 | 4,606E-03 | 1,397E-02 |
| Bt.23673.1.A1_at |              |           |                                                                                                                                                     | 1,656 | 3,152 | 4,810E-03 | 1,440E-02 |
| Bt.8690.1.S1_at  | PLEKHB2      | 783000    | pleckstrin homology domain containing, family B (evectins) member 2; similar to pleckstrin homology domain containing, family B (evectins) member 2 | 1,653 | 3,145 | 4,901E-03 | 1,448E-02 |
| Bt.3311.1.S1_at  |              |           |                                                                                                                                                     | 1,652 | 3,142 | 4,930E-03 | 1,448E-02 |
| Bt.28780.2.A1_at | FGD4         | 505234    | FYVE, RhoGEF and PH domain containing 4                                                                                                             | 1,649 | 3,137 | 4,993E-03 | 1,457E-02 |
| Bt.17193.1.A1_at |              |           |                                                                                                                                                     | 1,646 | 3,129 | 5,087E-03 | 1,466E-02 |
| Bt.11240.1.A1_at | TET2         | 538481    | similar to CXXC finger 6                                                                                                                            | 1,641 | 3,119 | 5,219E-03 | 1,486E-02 |
| Bt.6392.1.S1_at  | TRPM6        | 527597    | transient receptor potential cation channel, subfamily M, member 6                                                                                  | 1,632 | 3,099 | 5,473E-03 | 1,539E-02 |
| Bt.10692.1.S1_at | LOC100299693 | 100299693 | PRP38 pre-mRNA processing factor 38 (yeast) domain containing B                                                                                     | 1,628 | 3,092 | 5,576E-03 | 1,549E-02 |
| Bt.2943.1.A1_at  | CTR9         | 534265    | Ctr9, Paf1/RNA polymerase II complex component, homolog (S. cerevisiae)                                                                             | 1,624 | 3,082 | 5,713E-03 | 1,574E-02 |
| Bt.24759.2.S1_at |              |           |                                                                                                                                                     | 1,623 | 3,080 | 5,732E-03 | 1,574E-02 |
| Bt.4781.1.S1_at  | ADAM10       | 282132    | ADAM metallopeptidase domain 10                                                                                                                     | 1,619 | 3,072 | 5,841E-03 | 1,594E-02 |
| Bt.656.2.S1_at   | CORO1C       | 515798    | coronin, actin binding protein, 1C                                                                                                                  | 1,604 | 3,041 | 6,314E-03 | 1,675E-02 |
| Bt.19295.2.S1_at | APOLD1       | 538827    | apolipoprotein L domain containing 1                                                                                                                | 1,604 | 3,040 | 6,317E-03 | 1,675E-02 |
| Bt.21987.1.S1_at | PPIG         | 783720    | peptidylprolyl isomerase G (cyclophilin G)                                                                                                          | 1,600 | 3,032 | 6,445E-03 | 1,697E-02 |
| Bt.910.3.S1_at   | UFM1         | 530547    | ubiquitin-fold modifier 1                                                                                                                           | 1,599 | 3,029 | 6,501E-03 | 1,697E-02 |
| Bt.11772.1.A1_at | C18H16orf87  | 614339    | chromosome 18 open reading frame, human C16orf87                                                                                                    | 1,596 | 3,023 | 6,587E-03 | 1,698E-02 |
| Bt.25082.1.A1_at | MCOLN3       | 514345    | mucolipin 3                                                                                                                                         | 1,592 | 3,015 | 6,723E-03 | 1,718E-02 |

probesets

|                    |           |           |                                                                                                 |       |       |           |           |
|--------------------|-----------|-----------|-------------------------------------------------------------------------------------------------|-------|-------|-----------|-----------|
| Bt.9445.1.S1_at    | HMGXB3    | 509419    | HMG box domain containing 3                                                                     | 1,591 | 3,013 | 6,756E-03 | 1,718E-02 |
| Bt.18794.1.S1_at   |           |           |                                                                                                 | 1,589 | 3,008 | 6,840E-03 | 1,718E-02 |
| Bt.20506.1.S1_at   |           |           |                                                                                                 | 1,588 | 3,007 | 6,856E-03 | 1,718E-02 |
| Bt.28222.1.S1_at   | STRN3     | 516375    | striatin, calmodulin binding protein 3                                                          | 1,587 | 3,005 | 6,888E-03 | 1,718E-02 |
| Bt.20852.1.A1_at   | GNAS      | 281793    | GNAS complex locus                                                                              | 1,580 | 2,990 | 7,149E-03 | 1,760E-02 |
| Bt.18519.1.A1_at   | RSBN1     | 508231    | round spermatid basic protein 1                                                                 | 1,579 | 2,988 | 7,180E-03 | 1,760E-02 |
| Bt.8263.1.A1_at    |           |           |                                                                                                 | 1,577 | 2,983 | 7,266E-03 | 1,760E-02 |
| Bt.21412.1.A1_at   | TXLNG     | 515927    | taxilin gamma                                                                                   | 1,576 | 2,981 | 7,310E-03 | 1,760E-02 |
| Bt.179.1.S1_at     | SLC25A16  | 282524    | solute carrier family 25 (mitochondrial carrier; Graves disease autoantigen), member 16         | 1,575 | 2,980 | 7,319E-03 | 1,760E-02 |
| Bt.18551.1.S1_at   | PHF20L1   | 511990    | PHD finger protein 20-like 1                                                                    | 1,570 | 2,970 | 7,516E-03 | 1,798E-02 |
| Bt.11538.1.A1_at   |           |           |                                                                                                 | 1,546 | 2,919 | 8,510E-03 | 2,015E-02 |
| Bt.10260.1.S1_at   |           |           |                                                                                                 | 1,537 | 2,902 | 8,884E-03 | 2,073E-02 |
| Bt.27421.1.S1_at   | ARHGEF2   | 505940    | rho/rac guanine nucleotide exchange factor (GEF) 2                                              | 1,537 | 2,902 | 8,888E-03 | 2,073E-02 |
| Bt.16140.1.A1_at   | AGPAT5    | 530414    | 1-acylglycerol-3-phosphate O-acyltransferase 5 (lysophosphatidic acid acyltransferase, epsilon) | 1,537 | 2,901 | 8,892E-03 | 2,073E-02 |
| Bt.27858.1.A1_at   | TMED5     | 534351    | transmembrane emp24 protein transport domain containing 5                                       | 1,528 | 2,884 | 9,276E-03 | 2,141E-02 |
| Bt.21444.1.S1_at   | CDK2      | 519217    | cyclin-dependent kinase 2                                                                       | 1,518 | 2,864 | 9,758E-03 | 2,230E-02 |
| Bt.5928.1.S1_at    | HMBOX1    | 539099    | homeobox containing 1                                                                           | 1,515 | 2,859 | 9,890E-03 | 2,249E-02 |
| Bt.18474.1.A1_at   | SHOC2     | 511417    | soc-2 suppressor of clear homolog (C. elegans)                                                  | 1,513 | 2,854 | 1,000E-02 | 2,264E-02 |
| Bt.829.2.S1_at     | GOLPH3    | 531359    | golgi phosphoprotein 3 (coat-protein)                                                           | 1,502 | 2,833 | 1,055E-02 | 2,348E-02 |
| Bt.3072.2.S1_at    |           |           |                                                                                                 | 1,500 | 2,829 | 1,065E-02 | 2,354E-02 |
| Bt.4874.2.S1_a_at  | LUC7L3    | 539955    | cisplatin resistance-associated overexpressed protein                                           | 1,490 | 2,809 | 1,120E-02 | 2,460E-02 |
| Bt.28462.1.S1_at   | LTV1      | 507702    | LTV1 homolog (S. cerevisiae)                                                                    | 1,489 | 2,807 | 1,124E-02 | 2,460E-02 |
| Bt.8292.3.S1_at    | MED13L    | 517336    | mediator complex subunit 13-like                                                                | 1,484 | 2,797 | 1,152E-02 | 2,510E-02 |
| Bt.24703.1.S1_at   | NBN       | 522943    | nibrin                                                                                          | 1,480 | 2,790 | 1,172E-02 | 2,541E-02 |
| Bt.16148.2.A1_a_at | LOC532848 | 532848    | centrosomal protein KIAA1731-like                                                               | 1,477 | 2,783 | 1,193E-02 | 2,561E-02 |
| Bt.6863.1.A1_at    |           |           |                                                                                                 | 1,472 | 2,775 | 1,218E-02 | 2,592E-02 |
| Bt.13419.2.A1_at   | SEC63     | 541040    | SEC63 homolog (S. cerevisiae)                                                                   | 1,471 | 2,772 | 1,228E-02 | 2,601E-02 |
| Bt.22440.1.S1_at   | DCAF12    | 525161    | WD repeat domain 40A                                                                            | 1,466 | 2,762 | 1,257E-02 | 2,652E-02 |
| Bt.20414.3.S1_at   | ROCK1     | 785911    | E2F transcription factor 6; Rho-associated, coiled-coil containing protein kinase 2             | 1,464 | 2,760 | 1,266E-02 | 2,657E-02 |
| Bt.21855.1.S1_at   | TMED7     | 100125926 | transmembrane emp24 protein transport domain containing 7                                       | 1,456 | 2,744 | 1,317E-02 | 2,728E-02 |
| Bt.27028.1.S1_at   |           |           |                                                                                                 | 1,456 | 2,744 | 1,317E-02 | 2,728E-02 |
| Bt.21170.1.A1_at   | RASA2     | 533491    | RAS p21 protein activator 2                                                                     | 1,444 | 2,721 | 1,395E-02 | 2,841E-02 |
| Bt.22020.2.S1_at   | LIN7C     | 510125    | lin-7 homolog C (C. elegans)                                                                    | 1,444 | 2,720 | 1,397E-02 | 2,841E-02 |
| Bt.22840.1.S1_a_at | CD46      | 280851    | CD46 molecule, complement regulatory protein                                                    | 1,437 | 2,707 | 1,443E-02 | 2,911E-02 |
| Bt.15629.1.S1_at   | NSRP1     | 539841    | nuclear speckle splicing regulatory protein 1                                                   | 1,434 | 2,702 | 1,464E-02 | 2,940E-02 |

probesets

|                    |             |        |                                                                                                                                         |       |       |           |           |
|--------------------|-------------|--------|-----------------------------------------------------------------------------------------------------------------------------------------|-------|-------|-----------|-----------|
| Bt.18165.1.A1_at   | MAPK6       | 538094 | mitogen-activated protein kinase 6                                                                                                      | 1,432 | 2,698 | 1,476E-02 | 2,953E-02 |
| Bt.4079.2.S1_a_at  | TARDBP      | 540632 | TAR DNA binding protein                                                                                                                 | 1,431 | 2,696 | 1,484E-02 | 2,955E-02 |
| Bt.2808.1.S1_at    | RBM18       | 508615 | RNA binding motif protein 18                                                                                                            | 1,422 | 2,679 | 1,548E-02 | 3,043E-02 |
| Bt.13222.1.S1_at   | TMX3        | 615687 | thioredoxin-related transmembrane protein 3                                                                                             | 1,419 | 2,674 | 1,570E-02 | 3,048E-02 |
| Bt.16061.2.S1_at   | COG6        | 509305 | component of oligomeric golgi complex 6                                                                                                 | 1,417 | 2,670 | 1,587E-02 | 3,067E-02 |
| Bt.20258.2.S1_at   |             |        |                                                                                                                                         | 1,409 | 2,655 | 1,646E-02 | 3,147E-02 |
| Bt.633.2.S1_at     | SFXN1       | 511375 | sideroflexin 1                                                                                                                          | 1,406 | 2,649 | 1,670E-02 | 3,164E-02 |
| Bt.4823.1.S1_at    | ARPP19      | 282658 | cAMP-regulated phosphoprotein, 19 kD                                                                                                    | 1,405 | 2,649 | 1,673E-02 | 3,164E-02 |
| Bt.28408.1.S1_at   | MED1        | 520734 | mediator complex subunit 1                                                                                                              | 1,404 | 2,646 | 1,684E-02 | 3,164E-02 |
| Bt.20271.1.S1_at   |             |        |                                                                                                                                         | 1,404 | 2,646 | 1,684E-02 | 3,164E-02 |
| Bt.29959.1.S1_at   | CNOT6       | 534707 | CCR4-NOT transcription complex, subunit 6                                                                                               | 1,401 | 2,641 | 1,703E-02 | 3,187E-02 |
| Bt.2891.1.S1_at    | YWHAZ       | 287022 | tyrosine 3-monooxygenase/tryptophan 5-monooxygenase activation protein, zeta polypeptide                                                | 1,396 | 2,632 | 1,743E-02 | 3,248E-02 |
| Bt.3689.3.S1_a_at  | C28H10orf35 | 510161 | chromosome 10 open reading frame 35 ortholog                                                                                            | 1,391 | 2,623 | 1,783E-02 | 3,310E-02 |
| Bt.20939.1.A1_at   |             |        |                                                                                                                                         | 1,388 | 2,617 | 1,814E-02 | 3,352E-02 |
| Bt.16142.3.A1_at   | YWHAH       | 286862 | tyrosine 3-monooxygenase/tryptophan 5-monooxygenase activation protein, gamma polypeptide                                               | 1,386 | 2,613 | 1,829E-02 | 3,367E-02 |
| Bt.23985.1.A1_at   | ATRX        | 514473 | alpha thalassemia/mental retardation syndrome X-linked (RAD54 homolog, <i>S. cerevisiae</i> )                                           | 1,378 | 2,598 | 1,899E-02 | 3,482E-02 |
| Bt.4554.1.S1_at    | COMMD8      | 507292 | COMM domain containing 8                                                                                                                | 1,377 | 2,597 | 1,907E-02 | 3,483E-02 |
| Bt.4824.1.A1_at    | EXOC5       | 531907 | exocyst complex component 5                                                                                                             | 1,375 | 2,594 | 1,918E-02 | 3,490E-02 |
| Bt.23224.2.S1_at   |             |        |                                                                                                                                         | 1,365 | 2,576 | 2,008E-02 | 3,580E-02 |
| Bt.7092.1.S1_at    |             |        |                                                                                                                                         | 1,365 | 2,575 | 2,013E-02 | 3,580E-02 |
| Bt.17473.1.S1_at   | RPE         | 533764 | ribulose-5-phosphate-3-epimerase                                                                                                        | 1,360 | 2,567 | 2,055E-02 | 3,639E-02 |
| Bt.15742.1.S1_at   | CD47        | 282661 | CD47 molecule                                                                                                                           | 1,354 | 2,556 | 2,113E-02 | 3,714E-02 |
| Bt.19472.1.A1_at   | FAM175B     | 510233 | similar to LOC510233 protein; hypothetical protein LOC510233                                                                            | 1,352 | 2,552 | 2,134E-02 | 3,736E-02 |
| Bt.7389.3.S1_a_at  | TCERG1      | 540964 | transcription elongation regulator 1                                                                                                    | 1,348 | 2,545 | 2,175E-02 | 3,794E-02 |
| Bt.21372.1.S1_at   | WHSC1L1     | 513054 | Wolf-Hirschhorn syndrome candidate 1-like 1                                                                                             | 1,345 | 2,541 | 2,199E-02 | 3,821E-02 |
| Bt.24286.1.S1_at   | GPR137B     | 613826 | G protein-coupled receptor 137B                                                                                                         | 1,342 | 2,536 | 2,227E-02 | 3,854E-02 |
| Bt.27072.1.A1_at   | PB1         | 506557 | polybromo 1                                                                                                                             | 1,342 | 2,534 | 2,234E-02 | 3,854E-02 |
| Bt.16374.1.A1_at   | FUBP3       | 541080 | far upstream element (FUSE) binding protein 3                                                                                           | 1,341 | 2,533 | 2,244E-02 | 3,856E-02 |
| Bt.4557.1.S1_at    | IFNAR1      | 282257 | interferon, alpha; receptor                                                                                                             | 1,339 | 2,530 | 2,262E-02 | 3,861E-02 |
| Bt.807.1.S1_at     |             |        |                                                                                                                                         | 1,339 | 2,529 | 2,263E-02 | 3,861E-02 |
| Bt.9300.1.A1_at    | OGFRL1      | 519626 | opioid growth factor receptor-like 1                                                                                                    | 1,337 | 2,527 | 2,277E-02 | 3,870E-02 |
| Bt.9591.2.S1_at    |             |        |                                                                                                                                         | 1,336 | 2,525 | 2,291E-02 | 3,879E-02 |
| Bt.7805.2.S1_a_at  | NUCKS1      | 505585 | nuclear casein kinase and cyclin-dependent kinase substrate 1; similar to Nuclear casein kinase and cyclin-dependent kinase substrate 1 | 1,335 | 2,523 | 2,300E-02 | 3,880E-02 |
| Bt.12957.1.A1_a_at | TNRC6B      | 528167 | trinucleotide repeat containing 6B                                                                                                      | 1,330 | 2,513 | 2,356E-02 | 3,937E-02 |



probesets

|                    |           |        |                                                                              |        |        |           |           |
|--------------------|-----------|--------|------------------------------------------------------------------------------|--------|--------|-----------|-----------|
| Bt.25022.1.S1_at   |           |        |                                                                              | 1,329  | 2,512  | 2,367E-02 | 3,937E-02 |
| Bt.17161.1.S1_at   |           |        |                                                                              | 1,329  | 2,512  | 2,367E-02 | 3,937E-02 |
| Bt.5602.1.A1_at    | ZNF331    | 516156 | hypothetical protein LOC516156                                               | 1,323  | 2,502  | 2,425E-02 | 4,004E-02 |
| Bt.2763.1.S1_at    | PARG      | 281377 | poly (ADP-ribose) glycohydrolase                                             | 1,321  | 2,498  | 2,448E-02 | 4,028E-02 |
| Bt.10033.1.S1_at   | TNRC6A    | 541118 | trinucleotide repeat containing 6A                                           | 1,317  | 2,492  | 2,487E-02 | 4,069E-02 |
| Bt.16241.1.A1_at   |           |        |                                                                              | 1,315  | 2,489  | 2,510E-02 | 4,075E-02 |
| Bt.22716.1.A1_at   | RUFY1     | 528153 | RUN and FYVE domain containing 1                                             | 1,315  | 2,488  | 2,512E-02 | 4,075E-02 |
| Bt.23129.2.S1_at   | LAMC1     | 532572 | laminin, gamma 1 (formerly LAMB2)                                            | 1,312  | 2,483  | 2,548E-02 | 4,120E-02 |
| Bt.26316.1.A1_at   |           |        |                                                                              | 1,309  | 2,478  | 2,581E-02 | 4,151E-02 |
| Bt.3414.3.A1_a_at  | AGFG1     | 536149 | ArfGAP with FG repeats 1                                                     | 1,307  | 2,474  | 2,604E-02 | 4,167E-02 |
| Bt.6455.1.S1_at    | CUL4A     | 617935 | cullin 4A                                                                    | 1,305  | 2,470  | 2,629E-02 | 4,192E-02 |
| Bt.9326.1.S1_at    | DCUN1D1   | 539869 | DCN1, defective in cullin neddylation 1, domain containing 1 (S. cerevisiae) | 1,302  | 2,465  | 2,664E-02 | 4,216E-02 |
| Bt.18224.1.S1_at   |           |        |                                                                              | 1,301  | 2,465  | 2,670E-02 | 4,216E-02 |
| Bt.28468.1.A1_at   | SMAD5     | 768050 | SMAD family member 5                                                         | 1,301  | 2,464  | 2,675E-02 | 4,216E-02 |
| Bt.26811.1.S1_at   | SLC30A5   | 508169 | solute carrier family 30 (zinc transporter), member 5                        | 1,300  | 2,462  | 2,689E-02 | 4,216E-02 |
| Bt.21173.1.S1_at   | HUWE1     | 511826 | HECT, UBA and WWE domain containing 1                                        | 1,296  | 2,455  | 2,738E-02 | 4,267E-02 |
| Bt.13455.2.A1_at   | SACM1L    | 530577 | SAC1 suppressor of actin mutations 1-like (yeast)                            | 1,295  | 2,453  | 2,748E-02 | 4,267E-02 |
| Bt.17129.1.A1_at   |           |        |                                                                              | 1,290  | 2,445  | 2,803E-02 | 4,321E-02 |
| Bt.25433.1.S1_at   | C1GALT1C1 | 531644 | C1GALT1-specific chaperone 1                                                 | 1,280  | 2,429  | 2,926E-02 | 4,480E-02 |
| Bt.1781.1.A1_at    |           |        |                                                                              | 1,278  | 2,425  | 2,951E-02 | 4,504E-02 |
| Bt.7610.1.A1_at    |           |        |                                                                              | 1,277  | 2,423  | 2,968E-02 | 4,515E-02 |
| Bt.28376.1.S1_at   |           |        |                                                                              | 1,269  | 2,409  | 3,075E-02 | 4,663E-02 |
| Bt.10397.2.S1_at   | RNF20     | 513326 | ring finger protein 20                                                       | 1,263  | 2,400  | 3,150E-02 | 4,745E-02 |
| Bt.4976.1.S1_at    |           |        |                                                                              | 1,260  | 2,396  | 3,183E-02 | 4,780E-02 |
| Bt.13285.1.A1_at   | LARP1     | 505690 | La ribonucleoprotein domain family, member 1                                 | 1,260  | 2,394  | 3,195E-02 | 4,783E-02 |
| Bt.22341.1.A1_at   | VPS13C    | 783566 | vacuolar protein sorting 13 homolog C (S. cerevisiae)                        | 1,256  | 2,388  | 3,246E-02 | 4,842E-02 |
| Bt.28267.2.S1_a_at |           |        |                                                                              | 1,249  | 2,376  | 3,348E-02 | 4,925E-02 |
| Bt.269.1.S1_at     | ATP2C1    | 327663 | ATPase, Ca++ transporting, type 2C, member 1                                 | 1,247  | 2,374  | 3,365E-02 | 4,925E-02 |
| Bt.24333.1.S1_at   | TLK1      | 537517 | tousled-like kinase 1                                                        | 1,247  | 2,374  | 3,369E-02 | 4,925E-02 |
| Bt.23143.2.S1_at   | CSDE1     | 513993 | cold shock domain containing E1, RNA-binding                                 | 1,246  | 2,372  | 3,381E-02 | 4,925E-02 |
| Bt.20762.2.S1_at   | SPRYD7    | 615298 | SPRY domain containing 7                                                     | 1,246  | 2,372  | 3,386E-02 | 4,925E-02 |
| Bt.2294.1.S1_a_at  | UBA7      | 497204 | ubiquitin-like modifier activating enzyme 7                                  | -1,249 | -2,376 | 3,345E-02 | 4,925E-02 |
| Bt.100.1.S1_at     | ADRB2     | 281605 | adrenergic, beta-2-, receptor, surface                                       | -1,288 | -2,441 | 2,833E-02 | 4,353E-02 |
| Bt.24231.1.A1_at   | CEP78     | 537926 | centrosomal protein 78kDa                                                    | -1,290 | -2,446 | 2,798E-02 | 4,321E-02 |
| Bt.8436.1.S1_at    | IFI6      | 512913 | interferon, alpha-inducible protein 6                                        | -1,358 | -2,563 | 2,078E-02 | 3,666E-02 |
| Bt.9792.1.S1_at    | ARRDC4    | 538517 | arrestin domain containing 4                                                 | -1,411 | -2,658 | 1,632E-02 | 3,143E-02 |
| Bt.16725.2.A1_at   | UBE2L6    | 509471 | ubiquitin-conjugating enzyme E2L 6                                           | -1,424 | -2,683 | 1,535E-02 | 3,043E-02 |
| Bt.26735.1.S1_at   | SLC46A2   | 511556 | solute carrier family 46, member 2                                           | -1,476 | -2,782 | 1,198E-02 | 2,561E-02 |
| Bt.12327.1.S1_at   | TXNIP     | 506790 | thioredoxin interacting protein                                              | -1,502 | -2,831 | 1,058E-02 | 2,348E-02 |

probesets

|                   |         |        |                                 |        |        |           |           |
|-------------------|---------|--------|---------------------------------|--------|--------|-----------|-----------|
| Bt.22980.1.S1_at  | TRIM21  | 359715 | tripartite motif-containing 21  | -1,811 | -3,510 | 2,052E-03 | 8,130E-03 |
| Bt.8962.3.S1_s_at | USP18   | 515202 | ubiquitin specific peptidase 18 | -1,854 | -3,615 | 1,605E-03 | 7,237E-03 |
| Bt.8238.1.A1_at   | TRIB3   | 538465 | tribbles homolog 3 (Drosophila) | -1,859 | -3,627 | 1,561E-03 | 7,237E-03 |
| Bt.16326.1.S1_at  | TMEM140 | 515475 | transmembrane protein 140       | -2,082 | -4,233 | 3,981E-04 | 3,078E-03 |
| Bt.9519.1.S1_at   | SESN2   | 509863 | sestrin 2                       | -2,304 | -4,939 | 8,914E-05 | 9,618E-04 |

## Gene Functional Classification

### s303-control, 1 cluster

| Gene Group 1     |                                             | Enrichment Score: 0.5675 |         |
|------------------|---------------------------------------------|--------------------------|---------|
| AFFYMETRIX_ID    | Gene Name                                   | Gene Symbol              | Up/Down |
| Bt.24697.1.A1_at | kinesin family member 3A                    | KIF3A                    | 1       |
| Bt.28345.1.S1_at | ankyrin repeat domain 17                    | ANKRD17                  | 1       |
| Bt.19645.1.A1_at | chromodomain helicase DNA binding protein 1 | CHD1                     | 1       |
| Bt.4095.2.S1_at  | torsin family 1, member B (torsin B)        | TOR1B                    | 1       |
| Category         | Term                                        | Count                    | PValue  |
| GOTERM_MF_FAT    | GO:0005524~ATP binding                      | 4                        | 0,0013  |
| GOTERM_MF_FAT    | GO:0032559~adenyl ribonucleotide binding    | 4                        | 0,0014  |
| GOTERM_MF_FAT    | GO:0030554~adenyl nucleotide binding        | 4                        | 0,0016  |
| GOTERM_MF_FAT    | GO:0001883~purine nucleoside binding        | 4                        | 0,0016  |
| GOTERM_MF_FAT    | GO:0001882~nucleoside binding               | 4                        | 0,0017  |
| GOTERM_MF_FAT    | GO:0032555~purine ribonucleotide binding    | 4                        | 0,0028  |
| GOTERM_MF_FAT    | GO:0032553~ribonucleotide binding           | 4                        | 0,0028  |
| GOTERM_MF_FAT    | GO:0017076~purine nucleotide binding        | 4                        | 0,0032  |
| GOTERM_MF_FAT    | GO:0000166~nucleotide binding               | 4                        | 0,0053  |

### s534-control, 7 clusters

| Gene Group 1      |                                                       | Enrichment Score: 2.0353 |           |
|-------------------|-------------------------------------------------------|--------------------------|-----------|
| AFFYMETRIX_ID     | Gene Name                                             | Gene Symbol              | Up/Down   |
| Bt.2808.1.S1_at   | RNA binding motif protein 18                          | RBM18                    | 1         |
| Bt.27023.1.S1_at  | RNA-binding region (RNP1, RRM) containing 3           | NA                       | 1         |
| Bt.4079.2.S1_a_at | TAR DNA binding protein                               | TARDBP                   | 1         |
| Bt.18224.1.S1_at  | CUG triplet repeat, RNA binding protein 1             |                          | 1         |
| Bt.20407.2.A1_at  | cytoplasmic polyadenylation element binding protein 4 | CPEB4                    | 1         |
| Category          | Term                                                  | Count                    | PValue    |
| INTERPRO          | IPR012677:Nucleotide-binding, alpha-beta plait        | 5                        | 2,982E-08 |
| INTERPRO          | IPR000504:RNA recognition motif, RNP-1                | 5                        | 3,185E-08 |
| SMART             | SM00360:RRM                                           | 5                        | 6,216E-07 |
| GOTERM_MF_FAT     | GO:0000166~nucleotide binding                         | 5                        | 9,268E-04 |

GFC

SP\_PIR\_KEYWORDS rna-binding 2 0,0241

**Gene Group 2** Enrichment Score: 1.76603

| AFFYMETRIX_ID     | Gene Name                                                                                           | Gene Symbol | Up/Down |
|-------------------|-----------------------------------------------------------------------------------------------------|-------------|---------|
| Bt.2294.1.S1_a_at | ubiquitin-like modifier activating enzyme 7                                                         | UBA7        | -1      |
| Bt.16725.2.A1_at  | ubiquitin-conjugating enzyme E2L 6                                                                  | UBE2L6      | -1      |
| Bt.17148.2.S1_at  | fem-1 homolog c (C. elegans)                                                                        | FEM1C       | 1       |
| Bt.8962.3.S1_s_at | ubiquitin specific peptidase 18                                                                     | USP18       | -1      |
| Bt.8263.1.A1_at   | hect (homologous to the E6-AP (UBE3A) carboxyl terminus) domain and RCC1 (CHC1)-like domain (RLD) 1 |             | 1       |
| Bt.910.3.S1_at    | ubiquitin-fold modifier 1                                                                           | UFM1        | 1       |
| Bt.6455.1.S1_at   | cullin 4A                                                                                           | CUL4A       | 1       |

| Category        | Term                                                                  | Count | PValue    |
|-----------------|-----------------------------------------------------------------------|-------|-----------|
| GOTERM_BP_FAT   | GO:0043632~modification-dependent macromolecule catabolic process     | 7     | 2,716E-10 |
| GOTERM_BP_FAT   | GO:0019941~modification-dependent protein catabolic process           | 7     | 2,716E-10 |
| GOTERM_BP_FAT   | GO:0051603~proteolysis involved in cellular protein catabolic process | 7     | 4,655E-10 |
| GOTERM_BP_FAT   | GO:0044257~cellular protein catabolic process                         | 7     | 4,770E-10 |
| GOTERM_BP_FAT   | GO:0030163~protein catabolic process                                  | 7     | 7,632E-10 |
| GOTERM_BP_FAT   | GO:0044265~cellular macromolecule catabolic process                   | 7     | 1,230E-09 |
| GOTERM_BP_FAT   | GO:0009057~macromolecule catabolic process                            | 7     | 2,544E-09 |
| GOTERM_BP_FAT   | GO:0006508~proteolysis                                                | 7     | 1,151E-07 |
| GOTERM_BP_FAT   | GO:0032020~ISG15-protein conjugation                                  | 3     | 2,331E-06 |
| KEGG_PATHWAY    | bta04120:Ubiquitin mediated proteolysis                               | 4     | 1,953E-05 |
| SP_PIR_KEYWORDS | ubl conjugation pathway                                               | 4     | 5,129E-05 |

**Gene Group 3** Enrichment Score: 1.6820

| AFFYMETRIX_ID      | Gene Name                                                                                                | Gene Symbol  | Up/Down |
|--------------------|----------------------------------------------------------------------------------------------------------|--------------|---------|
| Bt.21170.1.A1_at   | RAS p21 protein activator 2                                                                              | RASA2        | 1       |
| Bt.21982.1.S1_a_at | IQ motif containing GTPase activating protein 1                                                          | IQGAP1       | 1       |
| Bt.24678.1.A1_at   | TBC1 domain family, member 9 (with GRAM domain) similar to IQ motif containing GTPase activating protein | TBC1D9       | 1       |
| Bt.20947.2.S1_at   | 2                                                                                                        | LOC100140708 | 1       |

GFC

|                  |                                                                    |              |               |
|------------------|--------------------------------------------------------------------|--------------|---------------|
| Bt.28780.2.A1_at | FYVE, RhoGEF and PH domain containing 4                            | FGD4         | 1             |
| <b>Category</b>  | <b>Term</b>                                                        | <b>Count</b> | <b>PValue</b> |
| GOTERM_BP_FAT    | GO:0051056~regulation of small GTPase mediated signal transduction | 5            | 1,143E-07     |
| GOTERM_MF_FAT    | GO:0030695~GTPase regulator activity                               | 5            | 2,584E-07     |
| GOTERM_MF_FAT    | GO:0060589~nucleoside-triphosphatase regulator activity            | 5            | 2,949E-07     |
| GOTERM_MF_FAT    | GO:0005096~GTPase activator activity                               | 4            | 4,037E-06     |
| GOTERM_MF_FAT    | GO:0008047~enzyme activator activity                               | 4            | 1,099E-05     |
| GOTERM_MF_FAT    | GO:0005083~small GTPase regulator activity                         | 4            | 1,524E-05     |
| GOTERM_MF_FAT    | GO:0005099~Ras GTPase activator activity                           | 3            | 1,319E-04     |
| GOTERM_BP_FAT    | GO:0046578~regulation of Ras protein signal transduction           | 2            | 0,0562        |
| KEGG_PATHWAY     | bta04810:Regulation of actin cytoskeleton                          | 2            | 0,0755        |

|                                  |                                                                                       |                    |                |
|----------------------------------|---------------------------------------------------------------------------------------|--------------------|----------------|
| <b>Gene Group 4</b>              | Enrichment Score: 1.3822                                                              |                    |                |
| <b>AFFYMETRIX_ID</b>             | <b>Gene Name</b>                                                                      | <b>Gene Symbol</b> | <b>Up/Down</b> |
| Bt.18165.1.A1_at                 | mitogen-activated protein kinase 6                                                    | MAPK6              | 1              |
| Bt.9710.1.S1_at                  | PRP4 pre-mRNA processing factor 4 homolog B (yeast)                                   | PRPF4B             | 1              |
| Bt.27436.1.A1_at                 | INO80 homolog (S. cerevisiae)                                                         | INO80              | 1              |
| Bt.8238.1.A1_at                  | tribbles homolog 3 (Drosophila)                                                       | TRIB3              | -1             |
| Bt.21444.1.S1_at                 | cyclin-dependent kinase 2                                                             | CDK2               | 1              |
| Bt.24975.1.S1_at                 | YTH domain containing 2                                                               | YTHDC2             | 1              |
| Bt.4095.2.S1_at                  | torsin family 1, member B (torsin B)                                                  | TOR1B              | 1              |
| Bt.6392.1.S1_at                  | transient receptor potential cation channel, subfamily M, member 6                    | TRPM6              | 1              |
| Bt.16725.2.A1_at                 | ubiquitin-conjugating enzyme E2L 6                                                    | UBE2L6             | -1             |
| Bt.24697.1.A1_at                 | kinesin family member 3A                                                              | KIF3A              | 1              |
| Bt.19645.1.A1_at                 | chromodomain helicase DNA binding protein 1                                           | CHD1               | 1              |
| Bt.2294.1.S1_a_at                | ubiquitin-like modifier activating enzyme 7                                           | UBA7               | -1             |
| Bt.23985.1.A1_at                 | alpha thalassemia/mental retardation syndrome X-linked (RAD54 homolog, S. cerevisiae) | ATRX               | 1              |
| Bt.24333.1.S1_at                 | tousled-like kinase 1                                                                 | TLK1               | 1              |
| Bt.120.1.S1_at, Bt.20414.3.S1_at | E2F transcription factor 6; Rho-associated, coiled-coil containing protein kinase 2   | ROCK2, ROCK1       | 1              |
| Bt.24692.1.S1_at                 | adrenergic, beta, receptor kinase 2                                                   | ADRBK2             | 1              |

| Category        | Term                                                   | Count | PValue    |
|-----------------|--------------------------------------------------------|-------|-----------|
| GOTERM_MF_FAT   | GO:0005524~ATP binding                                 | 16    | 3,843E-15 |
| GOTERM_MF_FAT   | GO:0032559~adenyl ribonucleotide binding               | 16    | 4,390E-15 |
| GOTERM_MF_FAT   | GO:0030554~adenyl nucleotide binding                   | 16    | 9,787E-15 |
| GOTERM_MF_FAT   | GO:0001883~purine nucleoside binding                   | 16    | 1,124E-14 |
| GOTERM_MF_FAT   | GO:0001882~nucleoside binding                          | 16    | 1,221E-14 |
| GOTERM_MF_FAT   | GO:0032555~purine ribonucleotide binding               | 16    | 1,613E-13 |
| GOTERM_MF_FAT   | GO:0032553~ribonucleotide binding                      | 16    | 1,613E-13 |
| GOTERM_MF_FAT   | GO:0017076~purine nucleotide binding                   | 16    | 3,143E-13 |
| GOTERM_MF_FAT   | GO:0000166~nucleotide binding                          | 16    | 4,053E-12 |
| INTERPRO        | IPR017442:Serine/threonine protein kinase-related      | 6     | 1,353E-07 |
| UP_SEQ_FEATURE  | domain:Protein kinase                                  | 5     | 2,745E-07 |
| INTERPRO        | IPR000719:Protein kinase, core                         | 6     | 4,010E-07 |
| GOTERM_BP_FAT   | GO:0006468~protein amino acid phosphorylation          | 8     | 5,427E-07 |
| SP_PIR_KEYWORDS | atp-binding                                            | 7     | 9,739E-07 |
| INTERPRO        | IPR002290:Serine/threonine protein kinase              | 5     | 1,421E-06 |
| GOTERM_BP_FAT   | GO:0016310~phosphorylation                             | 8     | 1,513E-06 |
| GOTERM_MF_FAT   | GO:0004672~protein kinase activity                     | 8     | 1,863E-06 |
| GOTERM_MF_FAT   | GO:0004674~protein serine/threonine kinase activity    | 7     | 2,902E-06 |
| INTERPRO        | IPR008271:Serine/threonine protein kinase, active site | 5     | 5,348E-06 |
| SP_PIR_KEYWORDS | serine/threonine-protein kinase                        | 5     | 5,565E-06 |
| SMART           | SM00220:S_TKc                                          | 5     | 5,931E-06 |
| GOTERM_BP_FAT   | GO:0006796~phosphate metabolic process                 | 8     | 6,433E-06 |
| GOTERM_BP_FAT   | GO:0006793~phosphorus metabolic process                | 8     | 6,433E-06 |
| SP_PIR_KEYWORDS | nucleotide-binding                                     | 7     | 7,320E-06 |
| INTERPRO        | IPR017441:Protein kinase, ATP binding site             | 5     | 1,009E-05 |
| UP_SEQ_FEATURE  | binding site:ATP                                       | 4     | 7,036E-05 |
| UP_SEQ_FEATURE  | active site:Proton acceptor                            | 4     | 3,703E-04 |
| GOTERM_MF_FAT   | GO:0004386~helicase activity                           | 4     | 4,234E-04 |
| UP_SEQ_FEATURE  | nucleotide phosphate-binding region:ATP                | 4     | 5,392E-04 |
| SP_PIR_KEYWORDS | kinase                                                 | 4     | 0,0015    |
| GOTERM_CC_FAT   | GO:0043232~intracellular non-membrane-bounded          | 5     | 0,0032    |
| GOTERM_CC_FAT   | organelle                                              | 5     | 0,0032    |
| GOTERM_CC_FAT   | GO:0043228~non-membrane-bounded organelle              | 5     | 0,0032    |
| GOTERM_BP_FAT   | GO:0032020~ISG15-protein conjugation                   | 2     | 0,0055    |
| SP_PIR_KEYWORDS | serine/threonine-specific protein kinase               | 2     | 0,0114    |
| GOTERM_CC_FAT   | GO:0005694~chromosome                                  | 3     | 0,0120    |

GFC

|                 |                                  |   |        |
|-----------------|----------------------------------|---|--------|
| SP_PIR_KEYWORDS | transferase                      | 4 | 0,0126 |
| UP_SEQ_FEATURE  | domain:AGC-kinase C-terminal     | 2 | 0,0132 |
| INTERPRO        | IPR000961:AGC-kinase, C-terminal | 2 | 0,0199 |
| SP_PIR_KEYWORDS | ATP                              | 2 | 0,0254 |
| SMART           | SM00133:S_TK_X                   | 2 | 0,0312 |
| UP_SEQ_FEATURE  | domain:PH                        | 2 | 0,0324 |
| SP_PIR_KEYWORDS | phosphotransferase               | 2 | 0,0329 |

**Gene Group 5** Enrichment Score: 0.77695

| AFFYMETRIX_ID     | Gene Name                                              | Gene Symbol | Up/Down |
|-------------------|--------------------------------------------------------|-------------|---------|
| Bt.269.1.S1_at    | ATPase, Ca++ transporting, type 2C, member 1           | ATP2C1      | 1       |
| Bt.4773.3.S1_a_at | ATPase, H+ transporting, lysosomal 70kDa, V1 subunit A | ATP6V1A     | 1       |
| Bt.8872.1.S1_at   | ATPase, Ca++ transporting, plasma membrane 1           | ATP2B1      | 1       |
| Bt.17311.2.S1_at  | retinitis pigmentosa 2 (X-linked recessive)            | RP2         | 1       |

| Category      | Term                                                               | Count | PValue    |
|---------------|--------------------------------------------------------------------|-------|-----------|
| GOTERM_BP_FAT | GO:0009145~purine nucleoside triphosphate biosynthetic process     | 4     | 1,005E-06 |
| GOTERM_BP_FAT | GO:0009206~purine ribonucleoside triphosphate biosynthetic process | 4     | 1,005E-06 |
| GOTERM_BP_FAT | GO:0009201~ribonucleoside triphosphate biosynthetic process        | 4     | 1,005E-06 |
| GOTERM_BP_FAT | GO:0009142~nucleoside triphosphate biosynthetic process            | 4     | 1,040E-06 |
| GOTERM_BP_FAT | GO:0009205~purine ribonucleoside triphosphate metabolic process    | 4     | 1,305E-06 |
| GOTERM_BP_FAT | GO:0009199~ribonucleoside triphosphate metabolic process           | 4     | 1,305E-06 |
| GOTERM_BP_FAT | GO:0009144~purine nucleoside triphosphate metabolic process        | 4     | 1,346E-06 |
| GOTERM_BP_FAT | GO:0009152~purine ribonucleotide biosynthetic process              | 4     | 1,520E-06 |
| GOTERM_BP_FAT | GO:0009141~nucleoside triphosphate metabolic process               | 4     | 1,757E-06 |
| GOTERM_BP_FAT | GO:0009260~ribonucleotide biosynthetic process                     | 4     | 1,757E-06 |
| GOTERM_BP_FAT | GO:0009150~purine ribonucleotide metabolic process                 | 4     | 2,073E-06 |

## GFC

|               |                                                                                                           |   |           |
|---------------|-----------------------------------------------------------------------------------------------------------|---|-----------|
| GOTERM_BP_FAT | GO:0006164~purine nucleotide biosynthetic process                                                         | 4 | 2,303E-06 |
| GOTERM_BP_FAT | GO:0009259~ribonucleotide metabolic process                                                               | 4 | 2,363E-06 |
| GOTERM_BP_FAT | GO:0006163~purine nucleotide metabolic process                                                            | 4 | 3,393E-06 |
| GOTERM_BP_FAT | GO:0009165~nucleotide biosynthetic process                                                                | 4 | 4,880E-06 |
| GOTERM_BP_FAT | GO:0034654~nucleobase, nucleoside, nucleotide and nucleic acid biosynthetic process                       | 4 | 5,601E-06 |
| GOTERM_BP_FAT | GO:0034404~nucleobase, nucleoside and nucleotide biosynthetic process                                     | 4 | 5,601E-06 |
| GOTERM_BP_FAT | GO:0044271~nitrogen compound biosynthetic process                                                         | 4 | 2,091E-05 |
| GOTERM_MF_FAT | GO:0019829~cation-transporting ATPase activity                                                            | 3 | 2,458E-05 |
| GOTERM_MF_FAT | GO:0042625~ATPase activity, coupled to transmembrane movement of ions                                     | 3 | 1,236E-04 |
| GOTERM_BP_FAT | GO:0006754~ATP biosynthetic process                                                                       | 3 | 2,504E-04 |
| GOTERM_MF_FAT | GO:0042626~ATPase activity, coupled to transmembrane movement of substances                               | 3 | 2,917E-04 |
| GOTERM_BP_FAT | GO:0046034~ATP metabolic process                                                                          | 3 | 2,957E-04 |
| GOTERM_MF_FAT | GO:0016820~hydrolase activity, acting on acid anhydrides, catalyzing transmembrane movement of substances | 3 | 2,981E-04 |
| GOTERM_MF_FAT | GO:0043492~ATPase activity, coupled to movement of substances                                             | 3 | 2,981E-04 |
| GOTERM_MF_FAT | GO:0015405~P-P-bond-hydrolysis-driven transmembrane transporter activity                                  | 3 | 3,517E-04 |
| GOTERM_MF_FAT | GO:0015399~primary active transmembrane transporter activity                                              | 3 | 3,517E-04 |
| GOTERM_MF_FAT | GO:0022890~inorganic cation transmembrane transporter activity                                            | 3 | 3,874E-04 |
| GOTERM_MF_FAT | GO:0042623~ATPase activity, coupled                                                                       | 3 | 0,0011    |
| GOTERM_MF_FAT | GO:0005524~ATP binding                                                                                    | 4 | 0,0013    |
| GOTERM_MF_FAT | GO:0032559~adenyl ribonucleotide binding                                                                  | 4 | 0,0014    |
| GOTERM_MF_FAT | GO:0016887~ATPase activity                                                                                | 3 | 0,0016    |
| GOTERM_MF_FAT | GO:0030554~adenyl nucleotide binding                                                                      | 4 | 0,0016    |
| GOTERM_MF_FAT | GO:0001883~purine nucleoside binding                                                                      | 4 | 0,0016    |
| GOTERM_MF_FAT | GO:0001882~nucleoside binding                                                                             | 4 | 0,0017    |
| INTERPRO      | IPR004014:ATPase, P-type cation-transporter, N-terminal                                                   | 2 | 0,0020    |



|                 |                                                                                                  |   |        |
|-----------------|--------------------------------------------------------------------------------------------------|---|--------|
| INTERPRO        | IPR006068:ATPase, P-type cation-transporter, C-terminal                                          | 2 | 0,0023 |
| GOTERM_MF_FAT   | GO:0015085~calcium ion transmembrane transporter activity                                        | 2 | 0,0026 |
| GOTERM_MF_FAT   | GO:0005388~calcium-transporting ATPase activity                                                  | 2 | 0,0026 |
| INTERPRO        | IPR018303:ATPase, P-type phosphorylation site                                                    | 2 | 0,0026 |
| GOTERM_MF_FAT   | GO:0032555~purine ribonucleotide binding                                                         | 4 | 0,0028 |
| GOTERM_MF_FAT   | GO:0032553~ribonucleotide binding                                                                | 4 | 0,0028 |
| INTERPRO        | IPR008250:ATPase, P-type, ATPase-associated region                                               | 2 | 0,0029 |
| PIR_SUPERFAMILY | PIRSF001297:Na(+)/K(+)-transporting ATPase alpha chain                                           | 2 | 0,0031 |
| GOTERM_MF_FAT   | GO:0017076~purine nucleotide binding                                                             | 4 | 0,0032 |
| INTERPRO        | IPR001757:ATPase, P-type, K/Mg/Cd/Cu/Zn/Na/Ca/Na/H-transporter                                   | 2 | 0,0042 |
| GOTERM_BP_FAT   | GO:0006812~cation transport                                                                      | 3 | 0,0048 |
| GOTERM_MF_FAT   | GO:0000166~nucleotide binding                                                                    | 4 | 0,0053 |
| SP_PIR_KEYWORDS | atp-binding                                                                                      | 3 | 0,0053 |
| GOTERM_MF_FAT   | GO:0015082~di-, tri-valent inorganic cation transmembrane transporter activity                   | 2 | 0,0062 |
| INTERPRO        | IPR005834:Haloacid dehalogenase-like hydrolase                                                   | 2 | 0,0069 |
| SP_PIR_KEYWORDS | hydrolase                                                                                        | 3 | 0,0088 |
| GOTERM_BP_FAT   | GO:0006811~ion transport                                                                         | 3 | 0,0097 |
| SP_PIR_KEYWORDS | nucleotide-binding                                                                               | 3 | 0,0105 |
| GOTERM_MF_FAT   | GO:0015662~ATPase activity, coupled to transmembrane movement of ions, phosphorylative mechanism | 2 | 0,0142 |
| GOTERM_BP_FAT   | GO:0006816~calcium ion transport                                                                 | 2 | 0,0254 |
| GOTERM_BP_FAT   | GO:0015674~di-, tri-valent inorganic cation transport                                            | 2 | 0,0351 |

**Gene Group 6****AFFYMETRIX\_ID**

|                  | Enrichment Score: 0.3898 | Gene Name                                                 | Gene Symbol | Up/Down |
|------------------|--------------------------|-----------------------------------------------------------|-------------|---------|
| Bt.21855.1.S1_at |                          | transmembrane emp24 protein transport domain containing 7 | TMED7       | 1       |
| Bt.27858.1.A1_at |                          | transmembrane emp24 protein transport domain containing 5 | TMED5       | 1       |
| Bt.22126.1.S1_at |                          | tetraspanin 5                                             | TSPAN5      | -1      |
| Bt.25433.1.S1_at |                          | C1GALT1-specific chaperone 1                              | C1GALT1C1   | 1       |

| Category        | Term                           | Count | PValue |
|-----------------|--------------------------------|-------|--------|
| INTERPRO        | IPR000348:emp24/gp25L/p24      | 2     | 0,0015 |
| INTERPRO        | IPR009038:GOLD                 | 2     | 0,0020 |
| SP_PIR_KEYWORDS | transmembrane                  | 4     | 0,0111 |
| UP_SEQ_FEATURE  | topological domain:Cytoplasmic | 3     | 0,0172 |
| SP_PIR_KEYWORDS | membrane                       | 4     | 0,0190 |
| UP_SEQ_FEATURE  | transmembrane region           | 3     | 0,0480 |

**Gene Group 7****AFFYMETRIX\_ID**

Bt.13990.2.S1\_at

Bt.23985.1.A1\_at

Bt.24537.1.A1\_at

Bt.28780.2.A1\_at

**Category**

GOTERM\_MF\_FAT

GOTERM\_MF\_FAT

GOTERM\_MF\_FAT

GOTERM\_MF\_FAT

GOTERM\_MF\_FAT

Enrichment Score: 0.0171

**Gene Name**

zinc finger, CCHC domain containing 8

alpha thalassemia/mental retardation syndrome X-linked (RAD54 homolog, *S. cerevisiae*)

zinc finger, RAN-binding domain containing 2

FYVE, RhoGEF and PH domain containing 4

**Gene Symbol**

ZCCHC8

ATRX

ZRANB2

FGD4

**Up/Down**

1

1

1

1

**Count**

4

4

4

4

4

**PValue**

0,0032

0,0062

0,0172

0,0178

0,0183
